# Supplementary material
Source: publisher figshare collection journal article supplement (https://frontiersin.figshare.com/ndownloader/files/21884427)
Supplement: Supplementary file [file 21884427]

## Supplementary Material

# Hybrid transcriptional regulators for the screening of target DNA motifs in organohalide-respiring bacteria

Mathilde Stéphanie Willemin, Marie Vingerhoets, Christof Holliger and Julien Maillard\*

Correspondence: [julien.maillard@epfl.ch](mailto:julien.maillard@epfl.ch)

## 1 Supplementary Data

### 1.1 Fusion PCR

Two primer pairs were used in Fusion PCR: F1, R1, F2 and R2. Primers F1 and R2 were designed as primers targeting the beginning and the end of the overall sequence to amplify. When needed, they include a restriction site to subsequently insert the sequence in the expression plasmid. Primers R1 and F2 are targeting the end of the first domain and the beginning of the second domain, respectively. They include a small tail of 5 nucleotides complementary to the fusion site. In a first round of PCR, the coding sequence of the two domains were amplified separately using the pair of primers F1/R1 and F2/R2, respectively. The two PCR products are then mixed in a 1:1 ratio (typically 50 ng of each products were completed with ddH<sub>2</sub>O to a total of 2 µL) to serve as template for a second round of PCR with primers F1 and R2 to generate the final PCR product.

| Reactant                                           | Stock Concentration | Round-1                |                        | Round-2<br>Fusion PCR |
|----------------------------------------------------|---------------------|------------------------|------------------------|-----------------------|
|                                                    |                     | 1 <sup>st</sup> domain | 2 <sup>nd</sup> domain |                       |
| Hi-Fi Buffer*                                      | 5×                  | 10 µL                  | 10 µL                  | 10 µL                 |
| DMSO                                               | 100 %               | 1.5 µL                 | 1.5 µL                 | -                     |
| MgCl <sub>2</sub>                                  | 50 mM               | 2 µL                   | 2 µL                   | 2 µL                  |
| dNTPs                                              | 10 mM               | 5 µL                   | 5 µL                   | 5 µL                  |
| Genomic DNA                                        | >5 ng/µL            | 2 µL                   | 2 µL                   | -                     |
| Mix of 1 <sup>st</sup> and 2 <sup>nd</sup> domains | 50 ng each          | -                      | -                      | 2 µL                  |
| Primer F1                                          | 10 µM               | 2.5 µL                 | -                      | 1.25 µL               |
| Primer R1                                          | 10 µM               | 2.5 µL                 | -                      | -                     |
| Primer F2                                          | 10 µM               | -                      | 2.5 µL                 | -                     |
| Primer R2                                          | 10 µM               | -                      | 2.5 µL                 | 1.25 µL               |
| ddH <sub>2</sub> O                                 | 100 %               | 23.5 uL                | 23.5 uL                | 27.5 µL               |
| VELOCITY DNA Polymerase*                           | -                   | 1 µL                   | 1 µL                   | 1 µL                  |
| Final volume                                       | -                   | 50 µL                  | 50 µL                  | 50 µL                 |

(\*Bioline, Labgene scientific, Châtel-St-Denis, Switzerland)

## 2 Supplementary Table

**Table 1.** List of oligonucleotides used in the study.

| Primer           | Sense | Sequence (5'→3')                                                                            | Gene target / plasmid                            | Reference     |
|------------------|-------|---------------------------------------------------------------------------------------------|--------------------------------------------------|---------------|
| MW031            | +     | GAATCCATGGGAGAAATTCTT<br>AAAAATTATATTTTC                                                    | <i>rdhK1</i> / pET24d                            | This study    |
| MW032            | -     | GCGCAAGCTTCAATAAGCTA<br>TCCCCTCTTCGAGAAG                                                    | <i>rdhK1</i> / pET24d                            | This study    |
| RdhK61A-F        | +     | GAATCCATGGGCGTTGAGGGG<br>TTAGGAAAAGAC                                                       | <i>rdhK61A</i> / pET24d                          | This study    |
| RdhK61A-R        | -     | GCGCAAGCTTCAATACGCAA<br>TGCCTTCTTCCAG                                                       | <i>rdhK61A</i> / pET24d                          | This study    |
| MW033            | +     | GAATCCATGGCTGTTGAAGGT<br>TTGGG                                                              | <i>rdhK61B</i> (EBD) /<br>pET24d                 | This study    |
| MW034            | -     | TGAAGACCGGTAATCTCCCCA<br>ATACTCTT                                                           | <i>rdhK61B</i> (EBD) /<br>pET24d                 | This study    |
| MW035            | +     | CCGGTCTTCATTATGTCACCGT<br>AAGCAAGATA                                                        | <i>rdhK61B</i> (DBD) /<br>pET24d                 | This study    |
| MW036            | -     | GCGCCTCGAGTCAATAAGCTA<br>TCCCCTCTTCGAGAAG                                                   | <i>rdhK61B</i> (DBD) /<br>pET24d                 | This study    |
| DBC-F            | +     | GAATTCTCAGGCGATGTAAC                                                                        | <i>mgl</i> -DB chassis                           | This study    |
| DBC-R            | -     | CGGTGCAATCATAGCTATC                                                                         | <i>mgl</i> -DB chassis                           | This study    |
| <i>mgl</i> -DB7  | +     | GAATTCTCAGGCGATGTAACC<br>GCTTTCAAAGTTAATACACAT<br>TAATACTCTTAACAATGTGAT<br>AGCTATGATTGCACCG | DB7 internal primer /<br><i>mgl</i> -DB chassis  | This study    |
| <i>mgl</i> -DB8  | +     | GAATTCTCAGGCGATGTAACC<br>GCTTTCAAATTTAGTATACGCT<br>AAATATCTTAACAATGTGATA<br>GCTATGATTGCACCG | DB8 internal primer /<br><i>mgl</i> -DB chassis  | This study    |
| <i>mgl</i> -noDB | +     | GAATTCTCAGGCGATGTAACC<br>GCTTTCAGCCTCTAGTGGCTG<br>GCTTGATCTTAACAATGTGAT<br>AGCTATGATTGCACCG | noDB internal primer /<br><i>mgl</i> -DB chassis | This study    |
| BG1743           | +     | GCGCAAGCTTGGCCAAGGTGCG<br>CCATGACG                                                          | <i>cprBA</i> promoter / pAK80                    | (Gabór, 2006) |
| BG1704           | -     | GCGGATCCGCTATAAAAACTA<br>AAAATGTACC                                                         | <i>cprBA</i> promoter / pAK80                    | (Gabór, 2006) |
| MW060            | -     | TCTCAACCTTTCCTTCCGTAGT                                                                      | <i>cpr</i> -DB7 promoter /<br>pAK80              | This study    |
| MW061            | +     | GATCCTTATTACAATATACCC<br>ATACTACTTT                                                         | <i>cpr</i> -DB7 promoter /<br>pAK80              | This study    |
| MW062            | +     | TGAGAAATTCAGGTAAATTTA<br>GTATACGCTAAATATTGCGTA<br>TGTGATCC                                  | <i>cpr</i> -DB8 internal primer /<br>pAK80       | This study    |
| MW063            | +     | TGAGAAATTCAGGTAGCCTCT<br>AGTGGCTGGCTTGATTGCGTA<br>TGTGATCC                                  | <i>cpr</i> -noDB internal primer<br>/ pAK80      | This study    |

### 3 Supplementary Figures

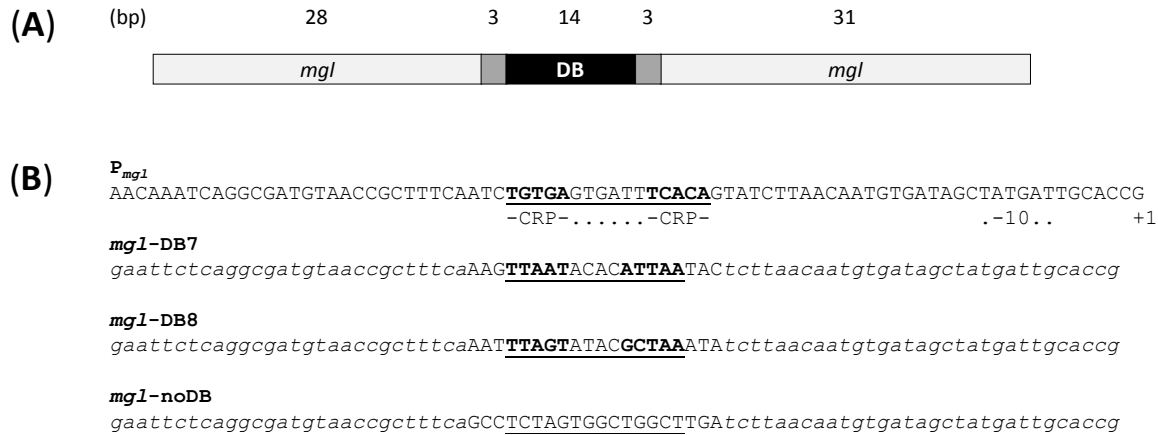

**Supplementary Figure 1.** Design of *mgl*-DB chassis for EMSA analysis. (A) Schematic representation of the *mgl* promoter containing the DB motif. Each *mgl*-DB DNA fragment is composed by a unique 20-nt long sequence corresponding to the DB sequence (14 nt) flanked by 3 nt on each side from the original *rdh* promoter, and embedded in a common DNA chassis derived from the *mglBAC* promoter ( $P_{mgl}$ ) from *E. coli*. This design was chosen to avoid experimental incompatibility as the *mgl* promoter shares structural features with promoters targeted by RdhK proteins and is known to be the target of CRP (Zheng et al. 2004). (B) For each DB of interest, a 79-nt long oligonucleotide was designed and used as template for PCR amplification with a pair of primers targeting the 5'- and 3'-ends of  $P_{mgl}$ .

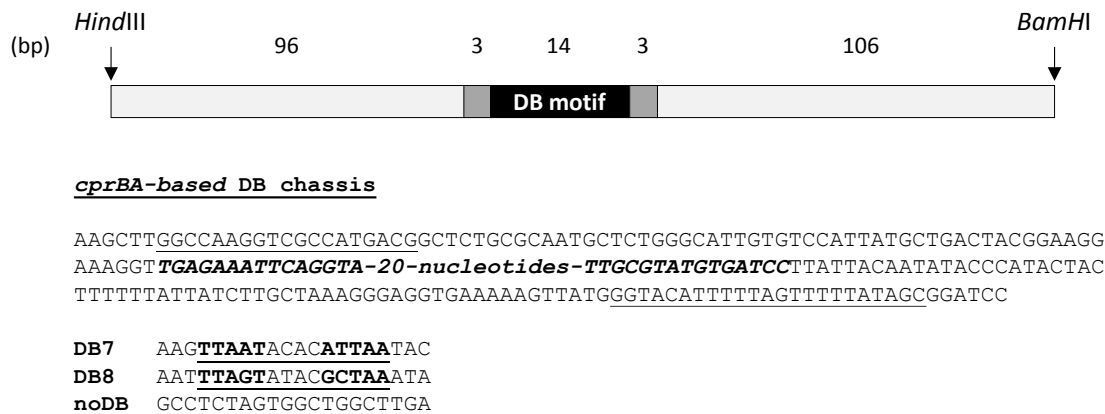

**Supplementary Figure 2.** Design of the *cprBA*-based DB chassis for *in vivo*  $\beta$ -galactosidase reporter assay. Schematic representation of the cloning strategy for the DB chassis used in fusion with the reporter gene. The DB7 motif and three flanking nucleotides on each side (20 bp in total) was replaced by DB8 or the non-palindromic noDB sequence. Using DB motifs embedded in the native *cprBA* promoter was chosen to address the question of the specificity of the DB motif exclusively. The 222-bp fragments were produced by fusion PCR (see Supplementary Data for details), and cloned into pAK80 carrying the  $\beta$ -galactosidase gene.

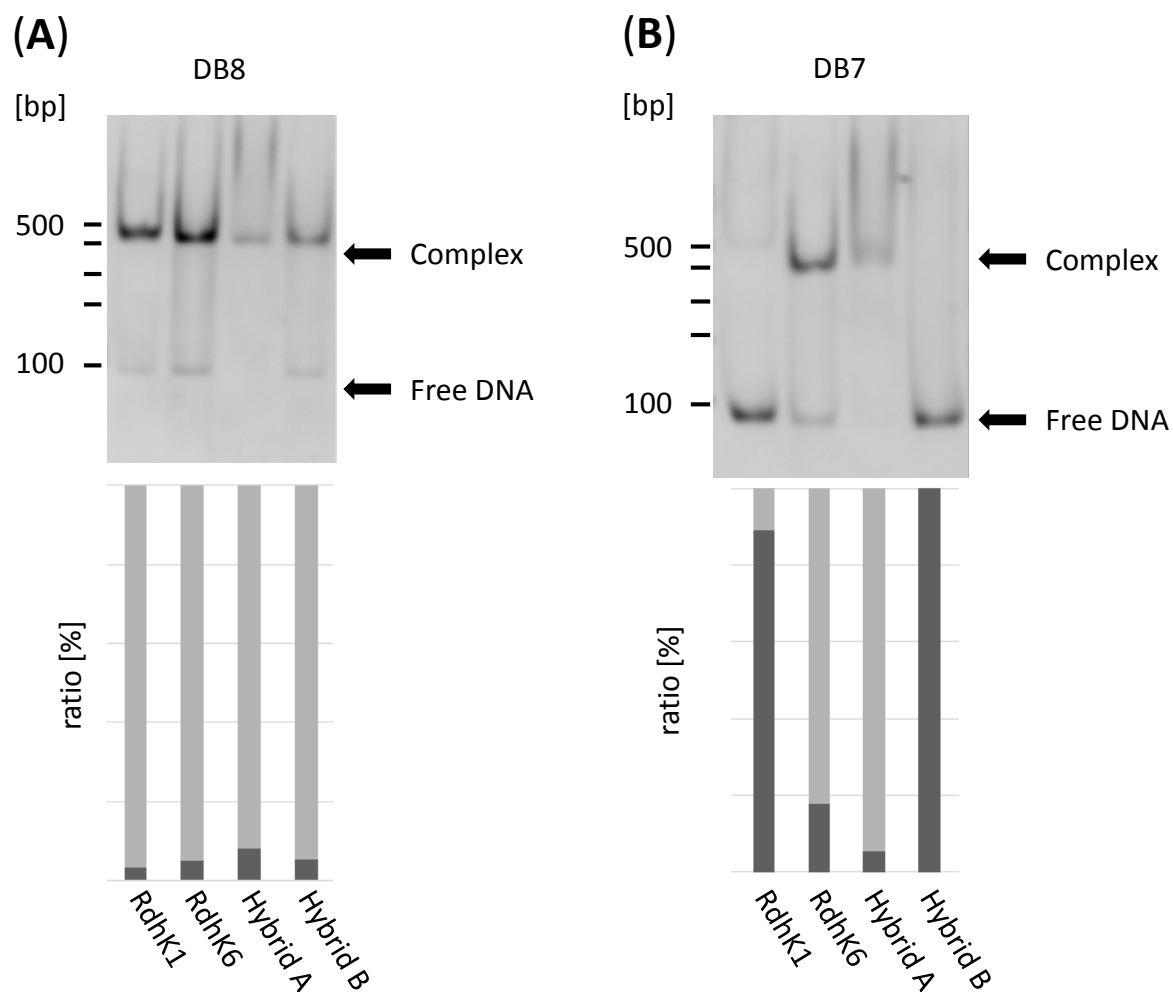

**Supplementary Figure 3.** Control EMSA experiments with the four RdhK proteins, DB8 (**A**) or DB7 (**B**), and the combination of both effectors. Both effectors (Cl-OHPA and 3,5-DCP) were added in a 1:1 ratio in the reactions. This experiment was used to exclude the influence of potential inhibitory or competitive events between the two compounds.

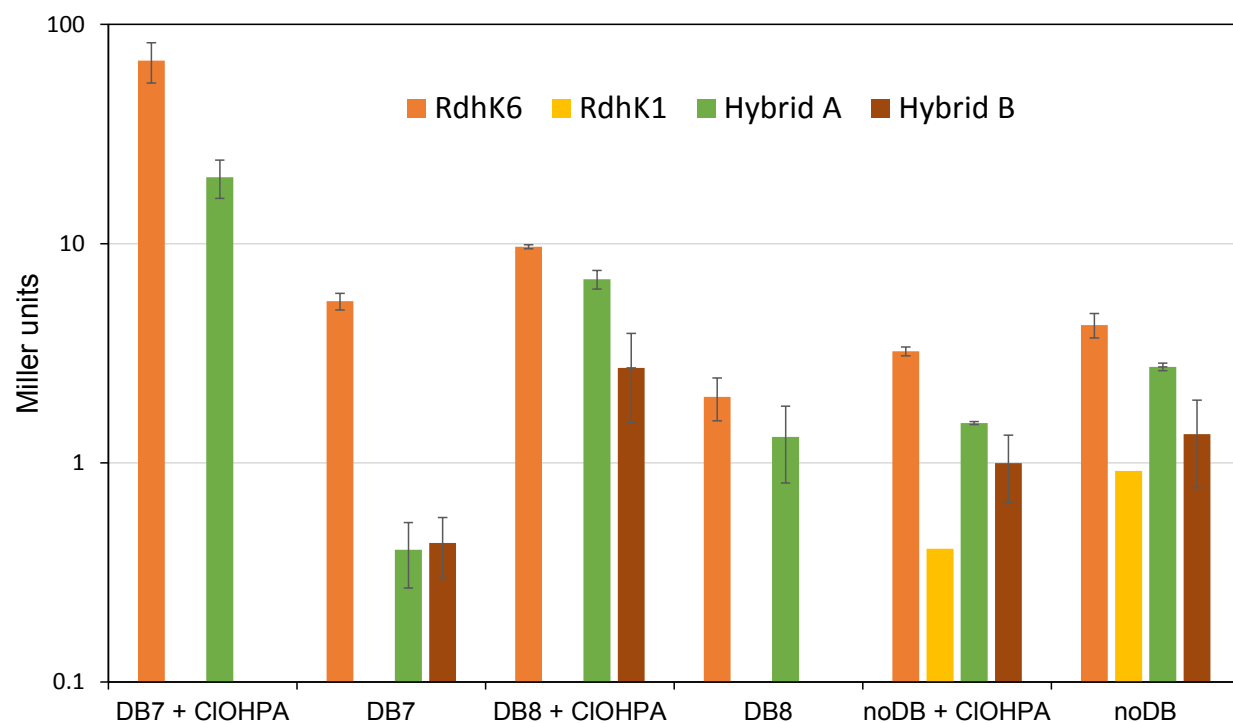

**Supplementary Figure 4.** Preliminary *in vivo*  $\beta$ -galactosidase assay for protomer-binding activity of RdhK proteins. The preliminary experiment was performed at small scale with all four proteins (RdhK6, RdhK1, Hybrid A and B) in combination with promoters carrying either DB7, DB8 or noDB motif in presence/absence of CI-OHPA as effector. Each experiment was run in triplicates and the protocol was adapted to be run in a screening mode using a 96-well reader plate. The most interesting RdhK/DB combinations were further tested at a larger scale in order to strengthen the signal-to-noise ratio.

|     |                |
|-----|----------------|
| DB5 | TTATTgcacATTAA |
| DB6 | TTAGTgcacTCTAA |
| DB7 | TTAATacacATTAA |
| DB8 | TTAGTatacGCTAA |
| FNR | TTGATacacATCAA |

**Supplementary Figure 5.** Sequence alignment of DB motifs recognized by RdhK6. The DB5, DB6 and DB7 motifs are part of the *rdh-6* gene cluster, DB8 belongs to the *rdh-1* gene cluster, while FNR motif represents the paradigmatic palindrome recognized by FNR.
